# Supplementary material for: Development and Validation of LC-MS/MS Method for the Determination of 1-Methyl-4-Nitrosopiperazine (MNP) in Multicomponent Products with Rifampicin—Analytical Challenges and Degradation Studies
Source: MDPI journal article supplement (doi:10.3390/molecules28217405), 2023-11-03
Supplement: s1 [file s1]

## Supplementary Material

# Development and validation of a universal LC-MS/MS method for the determination of 1-methyl-4-nitrosopiperazine (MNP) in multicomponent products with rifampicin - challenges and degradation studies

<sup>1</sup> Spectrometric Methods Department, National Medicines Institute, 30/34 Chełmska, 00-725 Warsaw, Poland; anna.witkowska@wum.edu.pl (A.B.W.); a.wolczynska@nil.gov.pl (A.W.); a.lis@nil.gov.pl (A.L.-C.)

<sup>2</sup> Department of Drug Chemistry, Doctoral School, Medical University of Warsaw, 61 Żwirki i Wigury, 02-091 Warsaw, Poland

\* Correspondence: e.stolarczyk@nil.gov.pl

**Table S1.** MNP content in the 3-component product - methods 1 and 2 comparison.

| Method                                                           | MNP content [ppm] |
|------------------------------------------------------------------|-------------------|
| Method 1 - Extraction with up to 5 mL of methanol                | 2.69              |
| Method 2- extraction - water with the addition of NaOH /methanol | 2.70              |

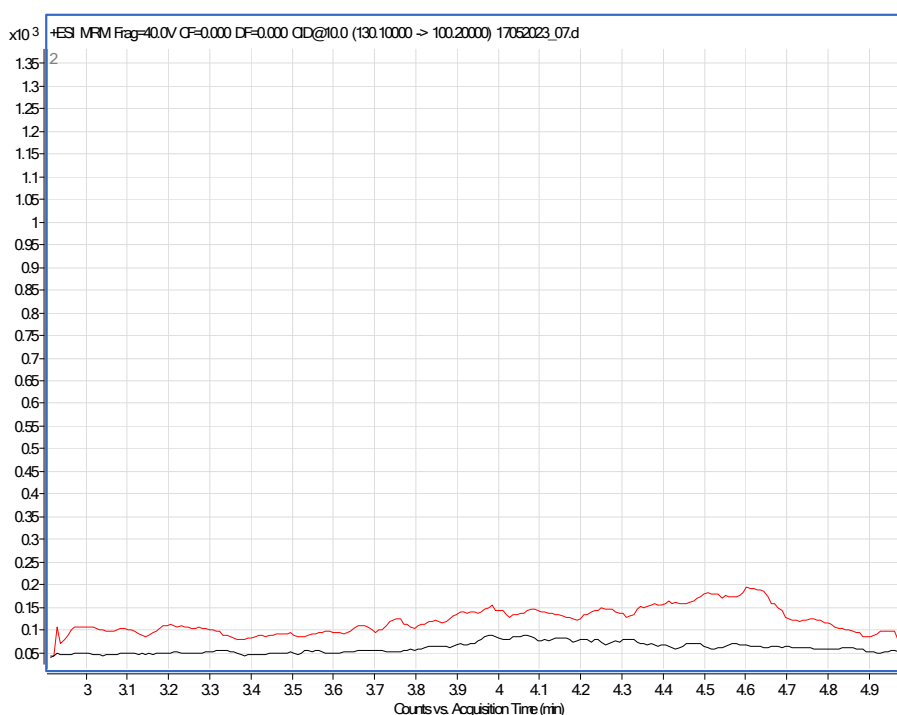

**Figure S1.** MRM chromatogram of blank for MNP (130.1 > 58.2 red curve, 130.1 > 100.2 black curve).

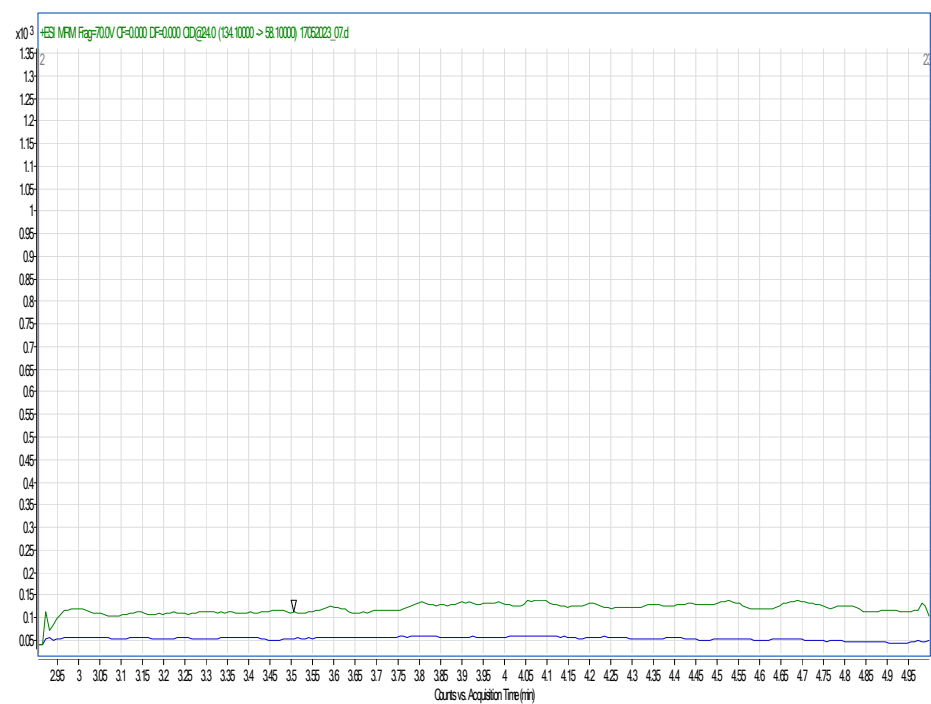

**Figure S2.** MRM chromatogram of blank for MNP-d4 (134.1 > 58.1 green curve, 134.1 > 104.1 blue curve).

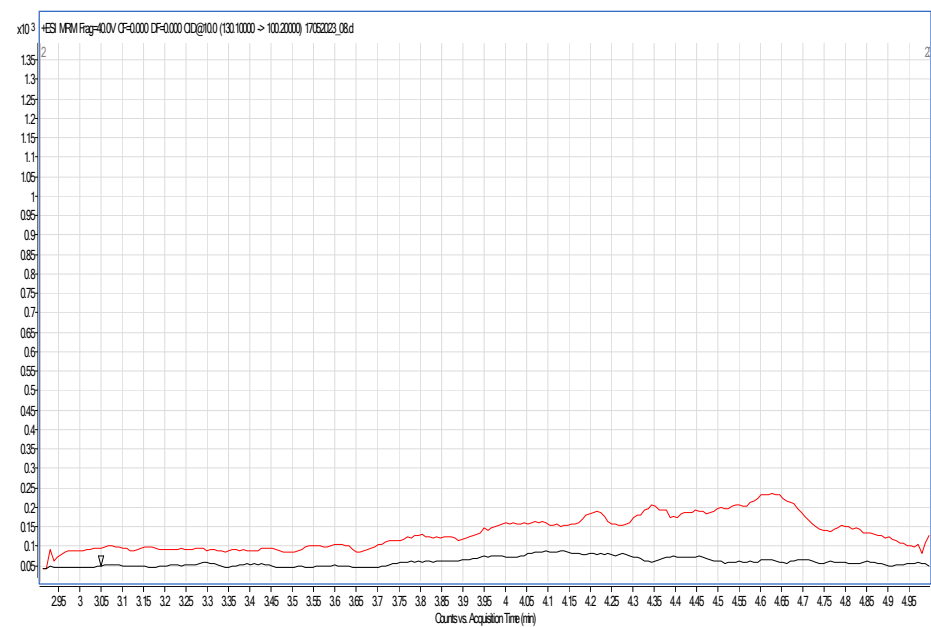

**Figure S3.** MRM chromatogram of blank solution spiked with the internal standard solution MNP-d4 for MNP (130.1 > 58.2 red curve, 130.1 > 100.2 black curve).

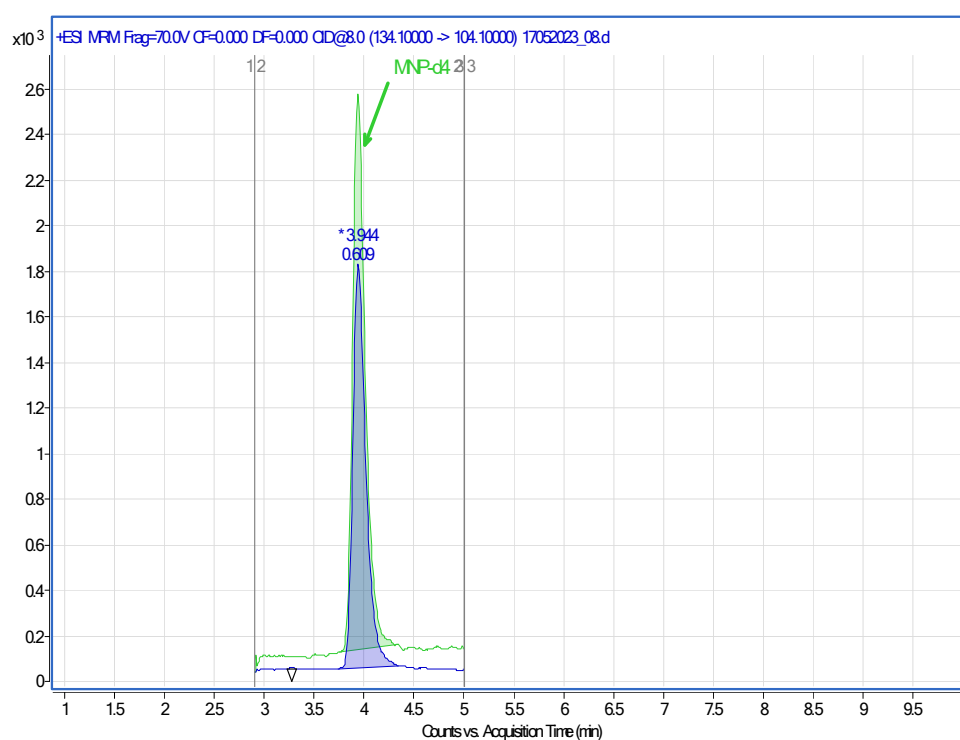

**Figure S4.** MRM chromatogram of blank solution spiked with the internal standard solution MNP-d4: MNP-d4 (134.1 > 58.1 green curve, 134.1 > 104.1 blue curve).

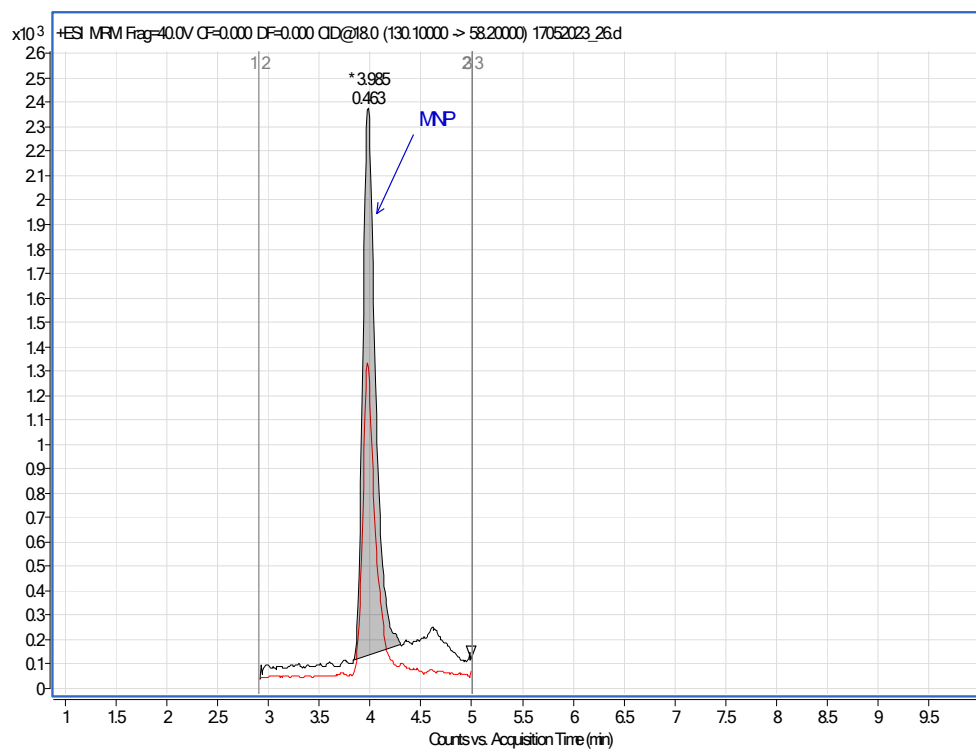

**Figure S5.** MRM chromatogram of standard solution of at 100% concentration level for MNP (130.1 > 100.2 red curve, 130.1 > 58.2 black curve).

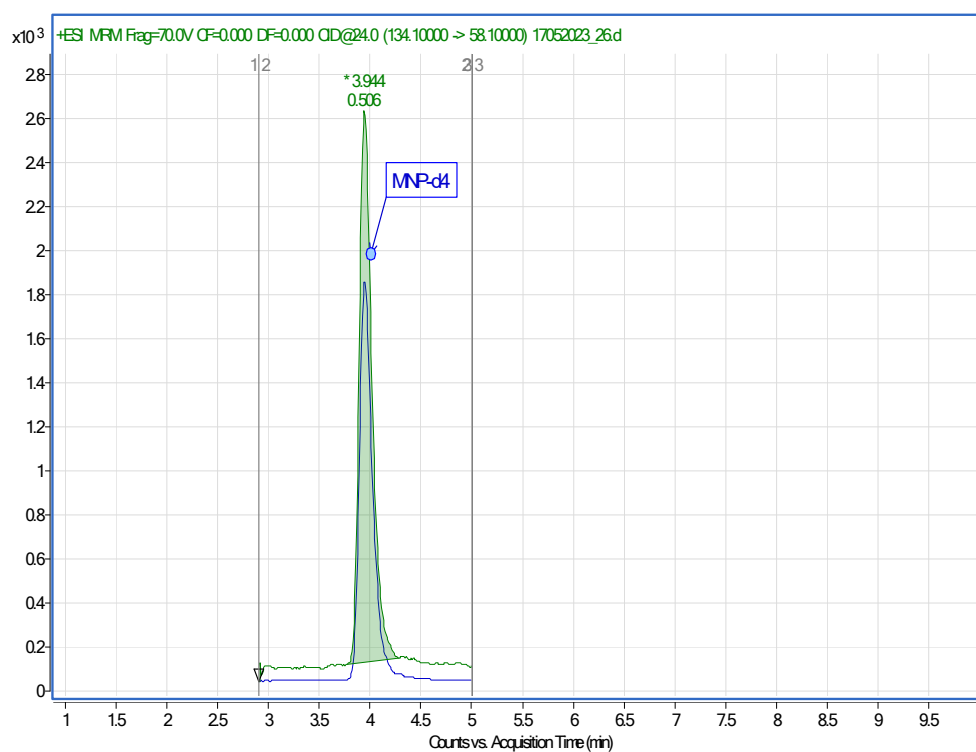

**Figure S6.** MRM chromatogram of standard solution of at 100% concentration level for MNP-d4 (134.1 > 58.1 green curve, 134.1 > 104.1 blue curve).

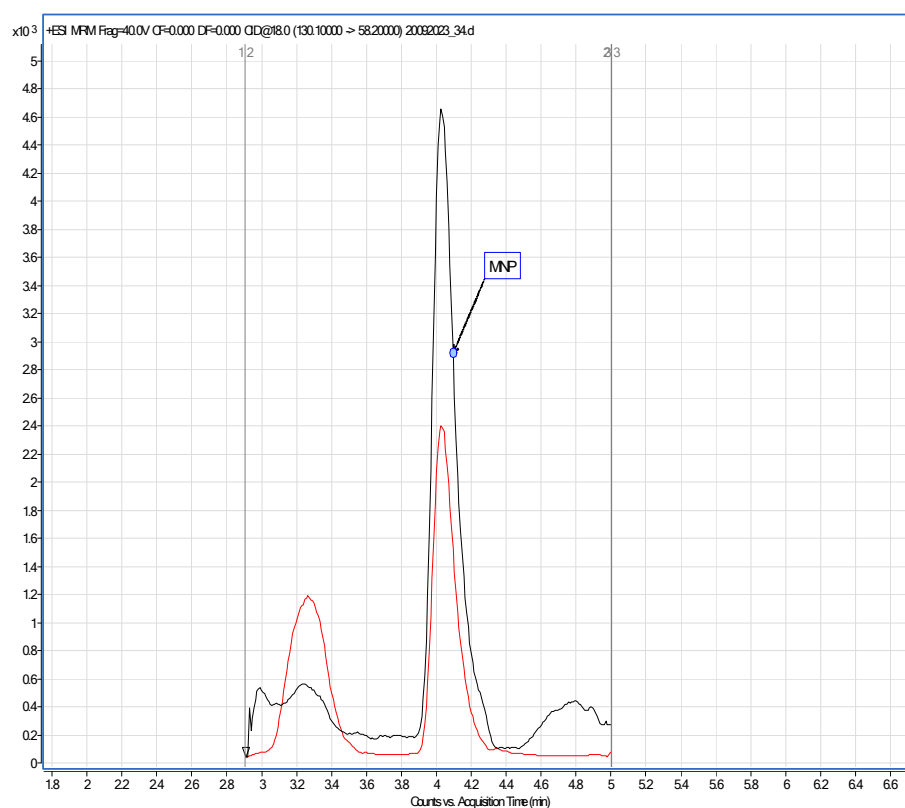

**Figure S7.** MRM chromatogram of sample solution of drug product (Rifampicin product four-component) for MNP (130.1 > 100.2 red curve, 130.1 > 58.2 black curve).

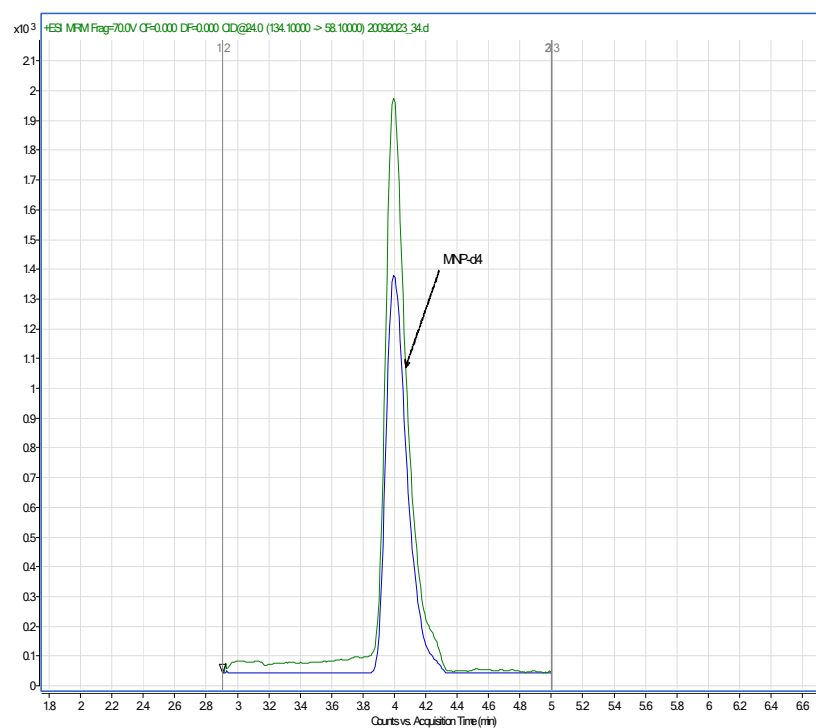

**Figure S8.** MRM chromatogram of sample solution of drug product (Rifampicin product four-component) for MNP-d4 (134.1 > 58.1 green curve, 134.1 > 104.1 blue curve).

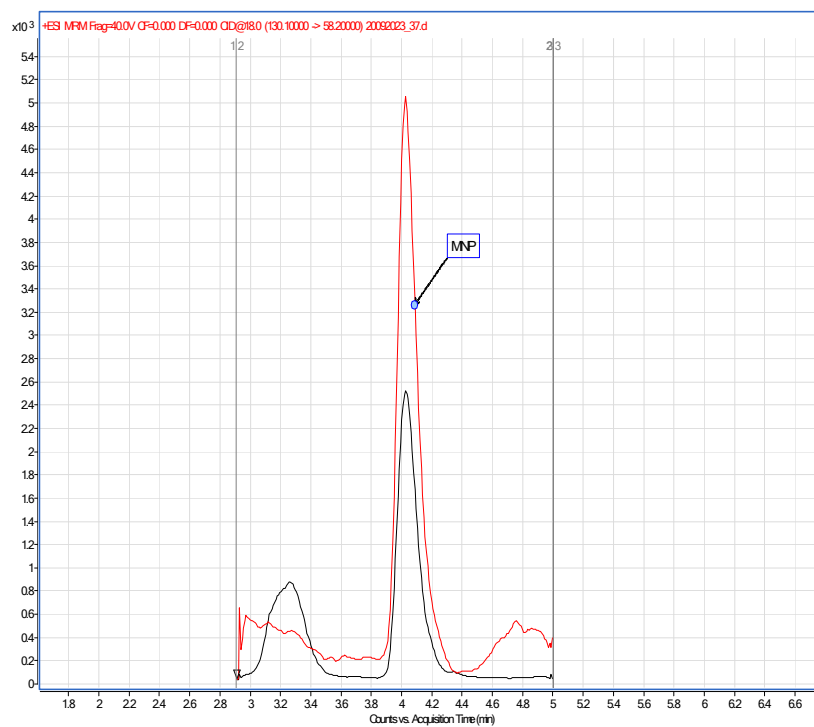

**Figure S9.** MRM chromatogram of reference solution (sample solution spiked with standard solution of MNP at concentration level of 17.22 ng/mL (5 ppm in respect to sample preparation) for MNP (130.1 > 58.2 red curve, 130.1 > 100.2 black curve).

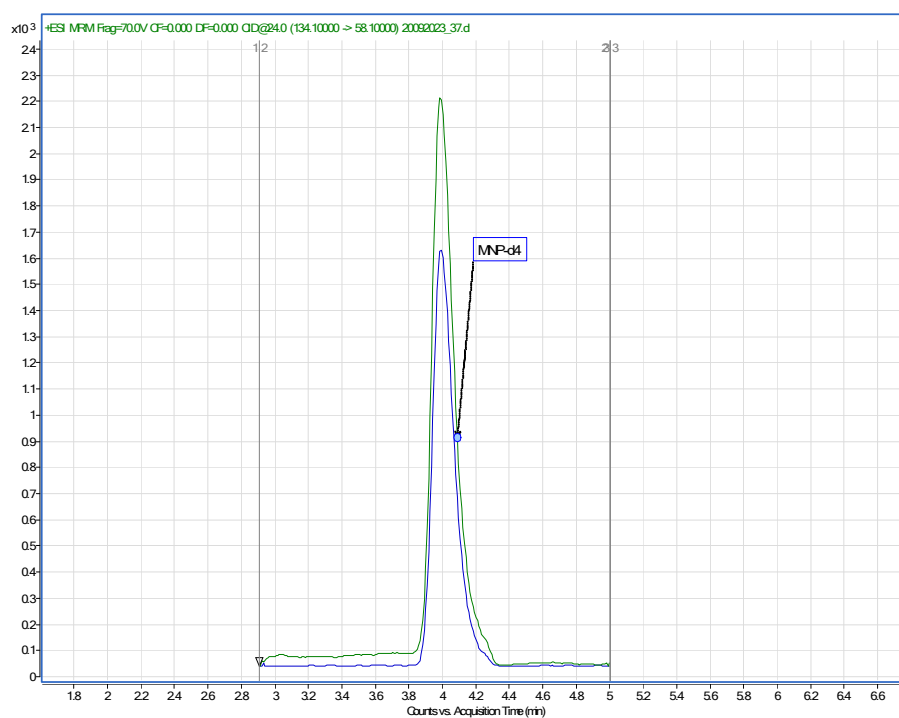

**Figure S10.** MRM chromatogram of reference solution (sample solution spiked with a standard solution of MNP at the concentration level of 17.22 ng/mL (5 ppm in respect to sample preparation) for MNP-d4 (134.1 > 58.1 green curve, 134.1 > 58.1 blue curve).

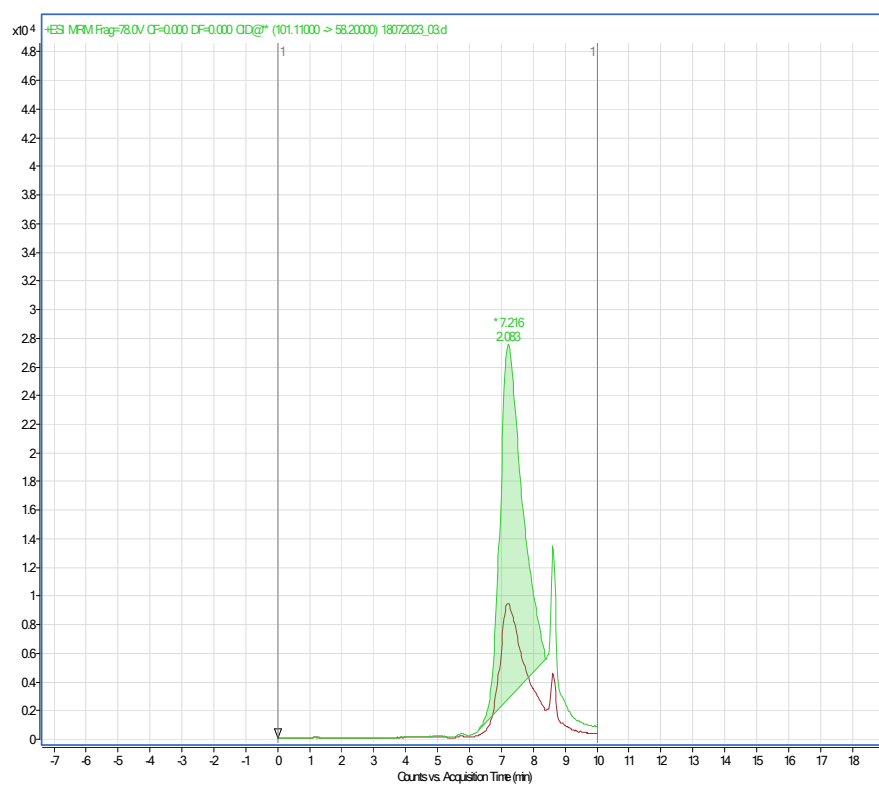

**Figure S11.** MRM chromatogram of 1-methyl-piperazine solution (101.1 > 58.2 green curve, 101.1 > 44.2 brown curve).

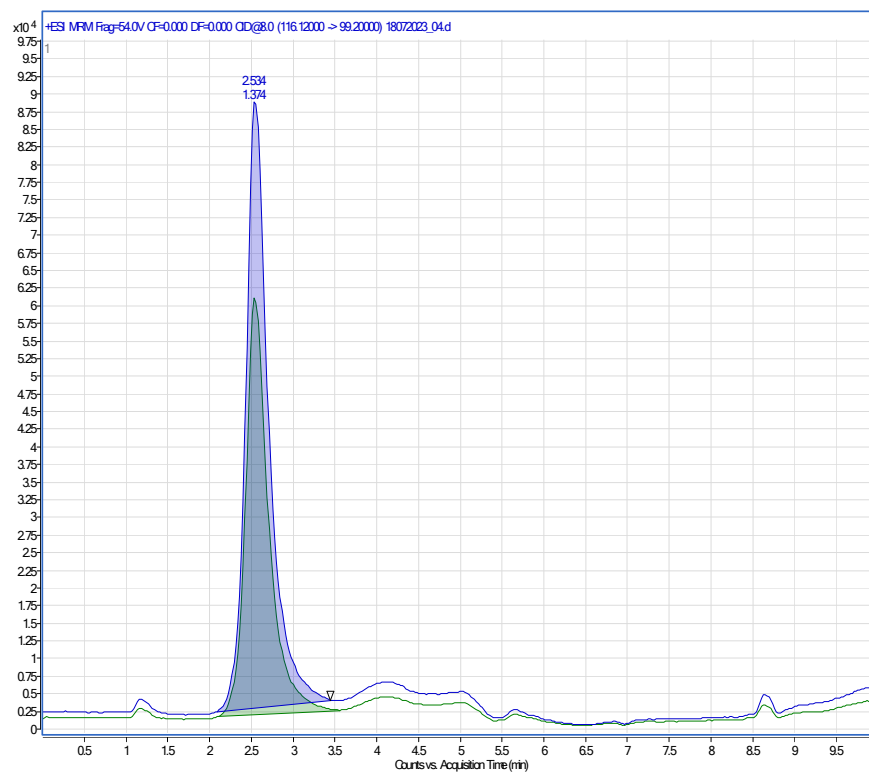

**Figure S12.** MRM chromatogram of 1-amino-4methyl-piperazine solution (116.12 > 99.2 blue curve, 116.12 > 56.1 green curve).

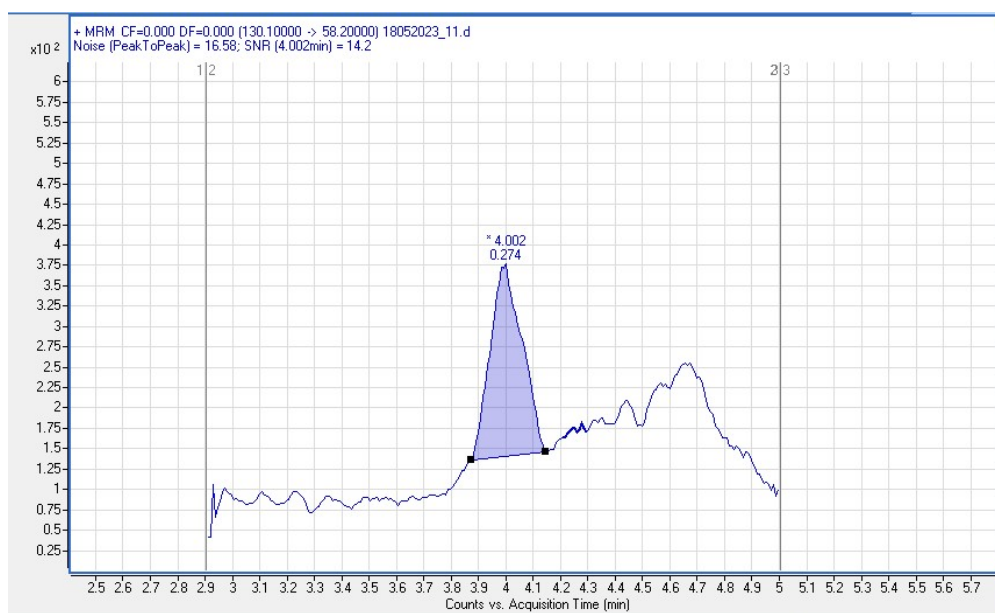

**Figure S13.** Chromatogram of LOQ solution of MNP 1.52 ppb.





**Table S3.** Results of examined reference solution with MNP at 100% concentration level.

| Time | Peak area MNP | Peak area MNP-d4 | Area MNP/Area MNP-d4 (Q) |
|------|---------------|------------------|--------------------------|
| 0 h  | 19737         | 22144            | 0.891                    |
| 0 h  | 19566         | 22213            | 0.881                    |
| 8h   | 20916         | 23626            | 0.885                    |
| 8h   | 20965         | 23426            | 0.895                    |
| 24 h | 20936         | 23666            | 0.885                    |
| 24 h | 20096         | 23094            | 0.870                    |
|      |               | Mean             | 0.885                    |
|      |               | SD               | 0.009                    |
|      |               | RSD%             | 0.978                    |

**Table S4.** Results of examined LOQ solution.

| Time | Peak area MNP | Peak area MNP-d4 | Area MNP/Area MNP-d4 (Q) |
|------|---------------|------------------|--------------------------|
| 0 h  | 1988          | 0.090            | 0.090                    |
| 0 h  | 1936          | 0.086            | 0.086                    |
| 24 h | 1935          | 0.082            | 0.082                    |
| 24 h | 1901          | 0.080            | 0.080                    |
|      |               | Mean             | 0.085                    |
|      |               | SD               | 0.004                    |
|      |               | RSD%             | 5.048                    |

**Table S5.** Results of sample solution.

| Time | Peak area MNP | Peak area MNP-d4 | Area MNP/Area MNP-d4(Q) |
|------|---------------|------------------|-------------------------|
| 0 h  | 8274          | 10287            | 0.804                   |
| 0 h  | 7241          | 8938             | 0.810                   |
| 4 h  | 7796          | 9735             | 0.801                   |
| 8 h  | 7426          | 8441             | 0.880                   |
|      |               | Mean             | 0.824                   |
|      |               | SD               | 0.038                   |
|      |               | RSD%             | 4.556                   |

**Table S6.** MS summary results for MNP and 1-amino-4-methylpiperazine.

| Compound name                 | RT, min | Precursor ion, m/z [M+H] <sup>+</sup> | Theoretical values, m/z | Predicted formula                               | Err, ppm | mSigma | Product ion (rel.int., %)                                                   |
|-------------------------------|---------|---------------------------------------|-------------------------|-------------------------------------------------|----------|--------|-----------------------------------------------------------------------------|
| 1-amino-4-methylpiperazine    | 3.1     | 116.1185                              | 116.1182                | C <sub>5</sub> H <sub>13</sub> N <sub>3</sub>   | -2.2     | 15.7   | 99.0916 (100.00%)<br>84.0694 (7.25%)<br>70.0694 (5.21%)<br>56.0502 (11.24%) |
| N-methyl_N'-nitrosopiperazine | 4.4     | 130.0977                              | 130.0975                | C <sub>5</sub> H <sub>12</sub> N <sub>3</sub> O | -4.6     | 17.5   | 128.0800 (65.02%)<br>100.0997 (100.00%)<br>58.0651 (11.22%)                 |

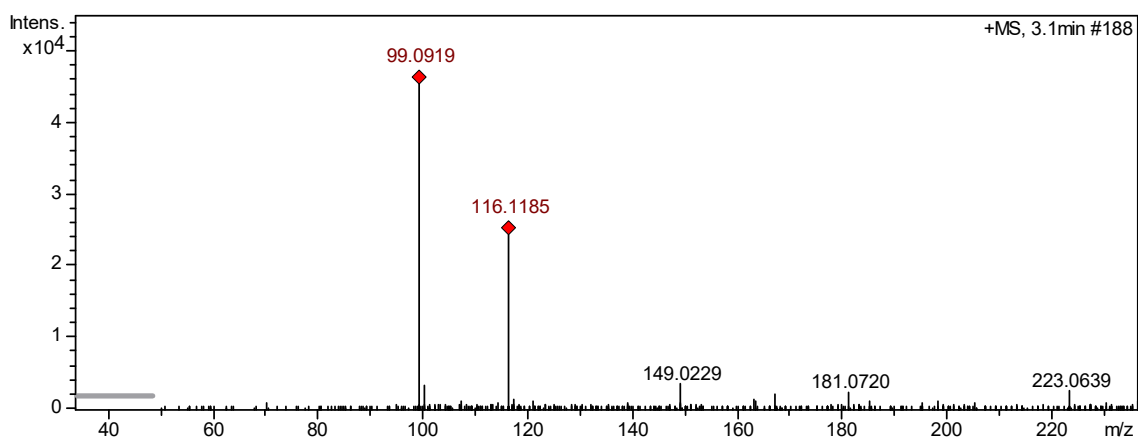

**Figure S15.** MS spectrum of 1-amino-4-methylpiperazine.

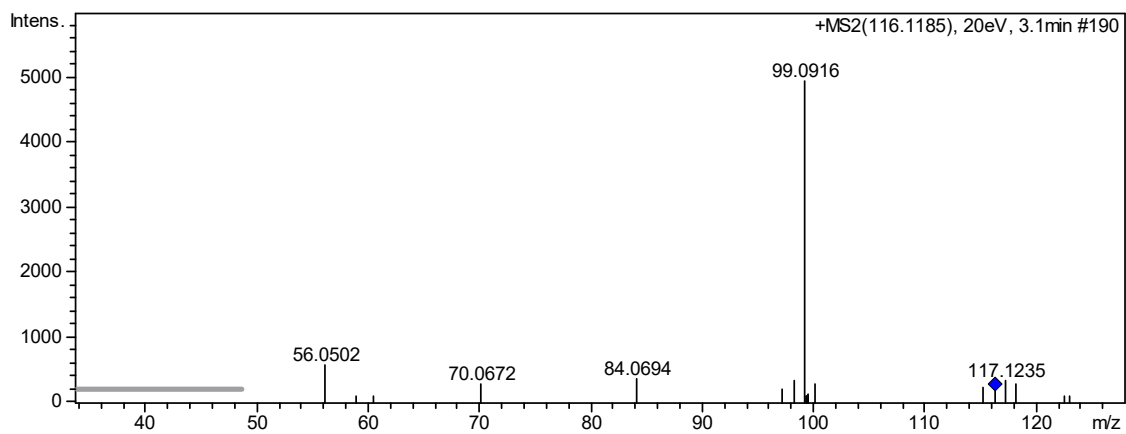

**Figure S16.** MS/MS spectrum of 1-amino-4-methylpiperazine.

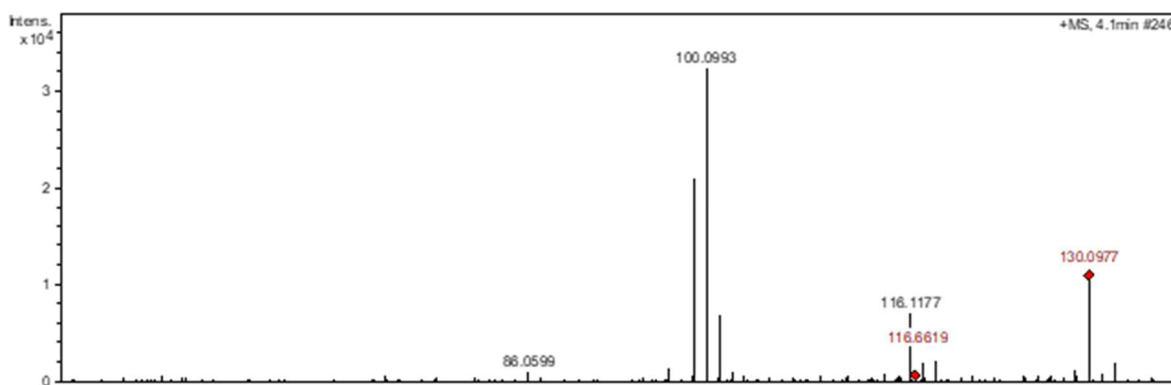

**Figure S17.** MS spectrum of MNP.

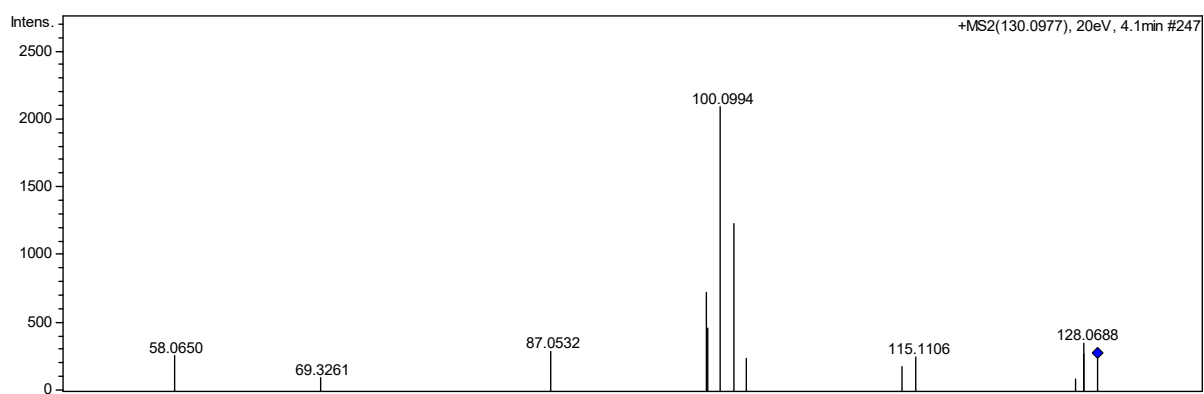

**Figure S18.** MS/MS spectrum of MNP.
